# Supplementary material for: Six Steps towards a Spatial Design for Large-Scale Pollinator Surveillance Monitoring
Source: MDPI journal article supplement (doi:10.3390/insects15040229), 2024-03-26
Supplement: s1 [file s1]

# Six Steps towards a Spatial Design for Large-Scale Pollinator Surveillance Monitoring

Niels Hellwig <sup>1,\*</sup>, Frank M. J. Sommerlandt <sup>1</sup>, Swantje Grabener <sup>1</sup>, Lara Lindermann <sup>1</sup>, Wiebke Sickel <sup>1</sup>, Lasse Krüger <sup>1</sup> and Petra Dieker <sup>1,2</sup>

<sup>1</sup> Thünen Institute of Biodiversity, Bundesallee 65, 38116 Braunschweig, Germany; frank.sommerlandt@thuenen.de (F.M.J.S.); swantje.grabener@thuenen.de (S.G.); lara.lindermann@thuenen.de (L.L.); wiebke.sickel@thuenen.de (W.S.); lasse.krueger@thuenen.de (L.K.); petra.dieker@thuenen.de (P.D.)

<sup>2</sup> National Monitoring Centre for Biodiversity, Federal Agency for Nature Conservation, Alte Messe 6, 04103 Leipzig, Germany

\* Correspondence: niels.hellwig@thuenen.de; Tel.: +49-531-596-2579

## Supplementary Materials

### Conceptual framework for the spatial sampling design

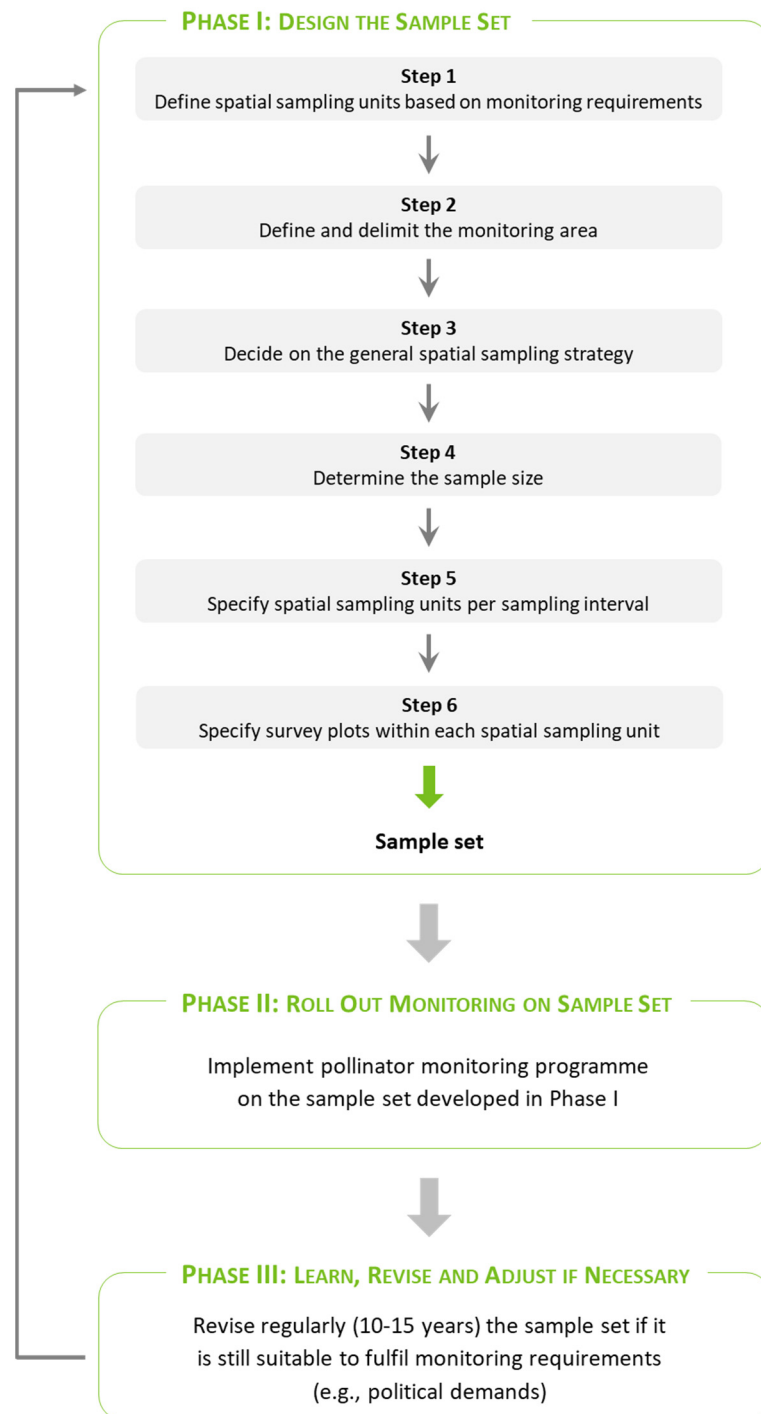

**Figure S1.** Six steps in spatial sampling design (Figure 2), as embedded and iteratively processed in three phases, which have been proposed in the road map for designing and implementing a monitoring programme by Reynolds et al. [21]. In Phase I, a sample set is designed, Phase II includes the roll-out of the monitoring, and in Phase III, results and experiences gained in the monitoring are used to revise and, if necessary, adjust the sample set. Phase III may be run multiple times due to new insights from the monitoring.

## Step 2: Delimit the agricultural landscape

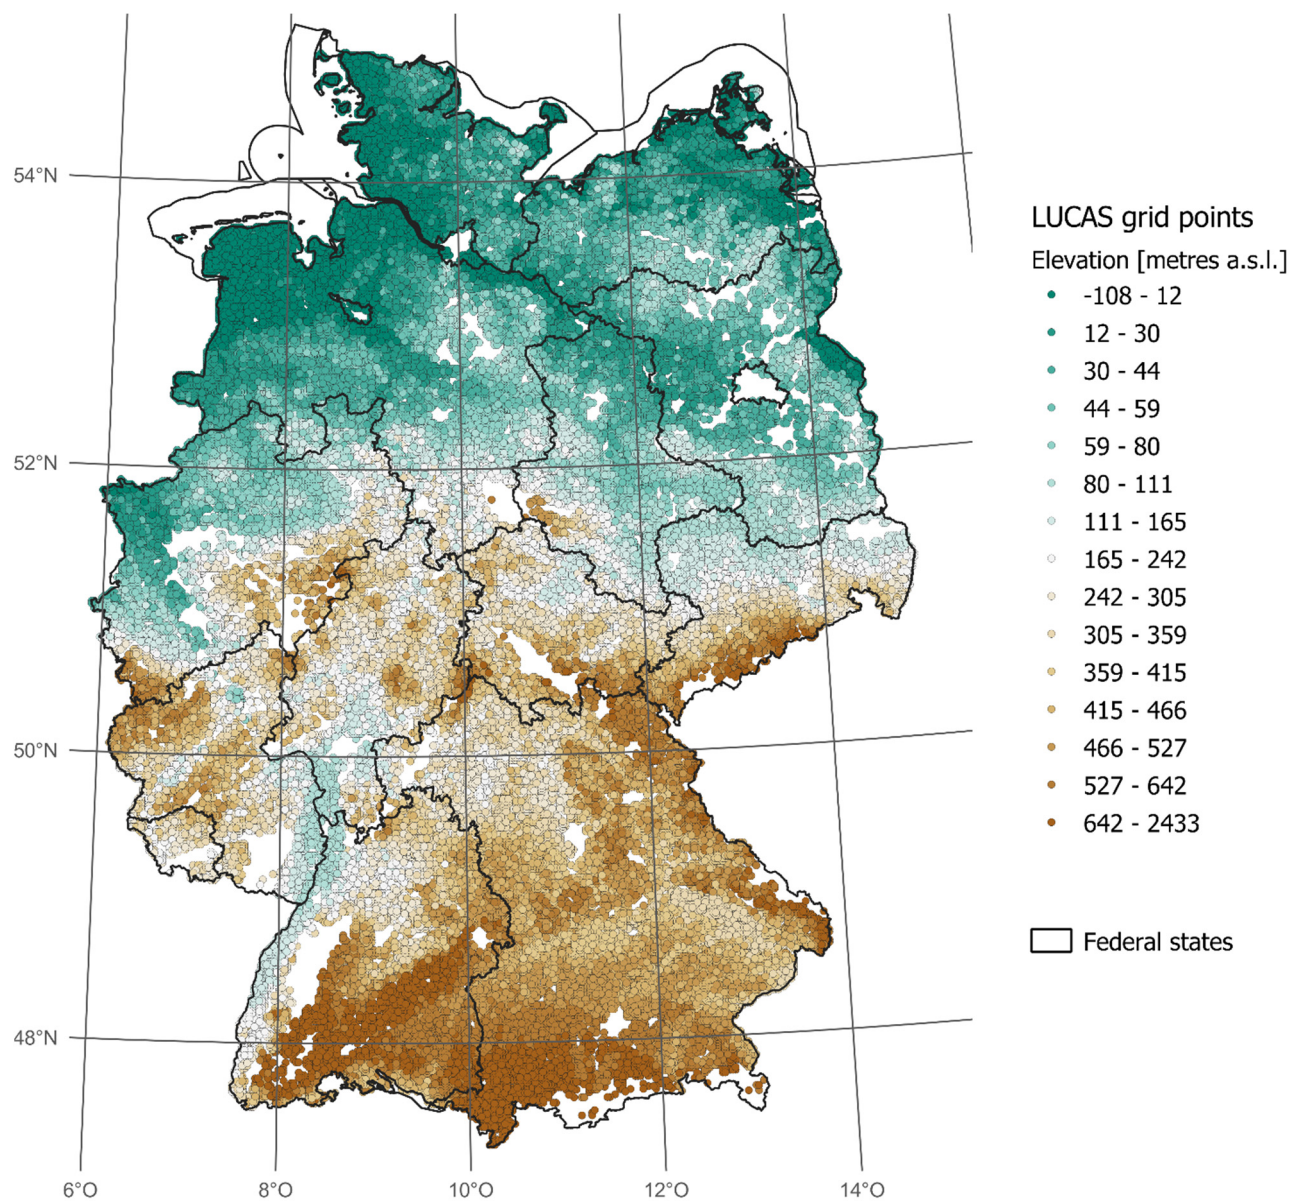

**Figure S2.** LUCAS grid points preselected by a threshold of 30 % agricultural areas per 3 km x 3 km quadrats and 1 km x 1 km subquadrats.

#### Step 4: Determine the sample size

**Table S1.** Species richness of cavity-nesting wild bees in nesting aids as detected by previous studies [101–110].

| Species richness | Spatial context                     | Reference                 |
|------------------|-------------------------------------|---------------------------|
| 5                | Göttingen, Lower Saxony             | Westphal et al. [101]     |
| 13               | Vaud / Swiss Plateau, Switzerland   | Fabian et al. [102]       |
| 22               | Jena Experiment, Thuringia          | Ebeling et al. [103]      |
| 10               | Wetterau, Hesse                     | Diekötter et al. [104]    |
| 14               | Kraichgau, Baden-Württemberg        | Gathmann et al. [105]     |
| 13               | Göttingen, Lower Saxony             | Krewenka et al. [106]     |
| 5                | Schleswig-Holstein                  | Kruess & Tscharntke [107] |
| 13               | Göttingen, Lower Saxony             | Steffan-Dewenter [108]    |
| 15               | Rhenish Hesse, Rhineland-Palatinate | Uzman et al. [109]        |
| 14               | Swabian Jura, Baden-Württemberg     | Steckel et al. [110]      |
| 16               | Hainich, Thuringia                  | Steckel et al. [110]      |
| 16               | Schorfheide, Brandenburg            | Steckel et al. [110]      |

## Step 5: Specify locations of landscape quadrats

**Table S2.** Sample of 950 landscape quadrats for the monitoring of cavity-nesting wild bees in the agricultural landscapes of Germany

| LUCAS id | Name               | LUCAS id | Name                          | LUCAS id | Name                      |
|----------|--------------------|----------|-------------------------------|----------|---------------------------|
| 40403084 | Aachen-Orsbach     | 41043132 | Düsseldorf-Hubbelrath         | 41522732 | Weitenau                  |
| 40562988 | Lahr               | 41043180 | Schermbeck                    | 41522764 | Schallstadt-West          |
| 40563004 | Arzfeld-Ost        | 41043212 | Vitiverter Mark               | 41522780 | Bahlingen-Süd             |
| 40563020 | Bleialf            | 41043276 | Wilsum-Nordwest               | 41522796 | Rust-Süd                  |
| 40563052 | Alzen              | 41202956 | Niederhambach                 | 41522940 | Olsbrücken                |
| 40563100 | Gereonsweiler      | 41203020 | Düngenheim                    | 41522956 | Odenbach                  |
| 40563116 | Gerderath          | 41203036 | Rieden                        | 41523004 | Badenhard                 |
| 40563132 | Brüggen-Südost     | 41203116 | Witzhelden                    | 41523020 | Brey                      |
| 40563196 | Kleve-Nord         | 41203148 | Essen-Südost                  | 41523036 | Vallendar-Nord            |
| 40722972 | Olk                | 41203196 | Maria Veen                    | 41523052 | Dernbach                  |
| 40723004 | Burbach (Eifel)    | 41203212 | Musholt                       | 41523068 | Helmenzen                 |
| 40723020 | Gondelsheim        | 41203228 | Heek-West                     | 41523084 | Spurkenbach               |
| 40723036 | Baasem             | 41203244 | Bardel                        | 41523116 | Kierspe                   |
| 40723068 | Abenden            | 41203276 | Alte Piccardie                | 41523132 | Hülscheid                 |
| 40723100 | Rödingen           | 41362732 | Huttingen                     | 41523148 | Schwerte-Ergste           |
| 40723116 | Hochneukirch       | 41362908 | Contwig-Ost                   | 41523164 | Dortmund-Scharnhorst      |
| 40723132 | Viersen-Ummen      | 41362924 | Bruchmühlbach-Miesau          | 41523180 | Südkirchen                |
| 40723148 | Kempen-Nord        | 41362940 | Rammelsbach                   | 41523196 | Davert-West               |
| 40723164 | Issum              | 41362956 | Truppenübungsplatz Baumholder | 41523212 | Nienberge                 |
| 40723180 | Xanten-Nordwest    | 41362972 | Hennweiler                    | 41523228 | Reckenfeld                |
| 40723196 | Millingen          | 41362988 | Heinzenbach                   | 41523244 | Rodde                     |
| 40882924 | Nalbach            | 41363004 | Sabershausen                  | 41523260 | Beesten                   |
| 40882972 | Schweich-Ost       | 41363020 | Kalt                          | 41523276 | Gersten                   |
| 40882988 | Arenrath           | 41363036 | Andernach-Miesenheim          | 41523308 | Sögel-Nordwest            |
| 40883004 | Deudesfeld         | 41363052 | Hausen (Wied)                 | 41523324 | Börgermoor                |
| 40883020 | Hohenfels-Essingen | 41363068 | Buchholz (Westerwald)         | 41523340 | Westoverledingen          |
| 40883036 | Ahrhütte           | 41363084 | Eisheid                       | 41523356 | Veenhusen                 |
| 40883068 | Ülpenich           | 41363116 | Wipperfürth-West              | 41523372 | Ludwigsdorf               |
| 40883084 | Wissersheim        | 41363180 | Ahsen                         | 41523388 | Willmsfeld                |
| 40883100 | Bergheim-Nordost   | 41363196 | Dülmen-Nordost                | 41682764 | Kirchzarten               |
| 40883116 | Ramrath            | 41363212 | Billerbeck                    | 41682812 | Diersburg                 |
| 40883132 | Meerbusch-Büderich | 41363228 | Burgsteinfurt-Südwest         | 41682828 | Willstätt-Sand            |
| 40883164 | Budberg            | 41363244 | Ohne                          | 41682940 | Münchweiler an der Alsenz |
| 40883180 | Wesel-Nord         | 41363276 | Holthausen-Biene              | 41683020 | Singhofen                 |

|          |                      |          |                           |          |                         |
|----------|----------------------|----------|---------------------------|----------|-------------------------|
| 41043004 | Strotzbüsch          | 41363308 | Oberlangen                | 41683036 | Holler                  |
| 41043020 | Horperath            | 41363324 | Neuheede                  | 41683052 | Freilingen              |
| 41043052 | Freisheim            | 41363340 | Wymeer                    | 41683068 | Luckenbach              |
| 41043068 | Miel                 | 41363372 | Loppersum                 | 41683116 | Ebberg                  |
| 41043084 | Brühl-Ost            | 41363388 | Wurzeldeich               | 41683164 | Bramey-Lenningsen       |
| 41683180 | Hamm-Nord            | 42002972 | Dexheim                   | 42322748 | Ehingen-Nord            |
| 41683196 | Sendenhorst-West     | 42003004 | Naurod                    | 42322780 | Bubsheim-West           |
| 41683212 | Telgte-Nord          | 42003020 | Bad Camberg-Südost        | 42322796 | Geislingen-Süd          |
| 41683228 | Ladbergen-Ost        | 42003036 | Elkerhausen               | 42322812 | Bad Imnau / Starzach    |
| 41683244 | Ibbenbüren-Ost       | 42003052 | Greifenstein-Allendorf    | 42322828 | Jettingen               |
| 41683260 | Voltlage             | 42003100 | Erndtebrück-Nordost       | 42322844 | Calw-Ost                |
| 41683276 | Bippen               | 42003116 | Schmallenberg             | 42322892 | Menzingen               |
| 41683292 | Löningen-Süd         | 42003132 | Nichtinghausen            | 42322908 | Horrenberg              |
| 41683308 | Bockholte            | 42003148 | Hirschberg                | 42322940 | Vöckelsbach             |
| 41683324 | Hilkenbrook          | 42003164 | Altengeseke               | 42322956 | Kolmbach                |
| 41683340 | Elisabethfehn        | 42003180 | Liesborn                  | 42322972 | Roßdorf                 |
| 41683356 | Selverde             | 42003196 | Rheda-Nordwest            | 42322988 | Dietzenbach-Hexenberg   |
| 41683388 | Negenbargen          | 42003212 | Hesselteich-Süd           | 42323020 | Wöllstadt               |
| 41842764 | Waldau               | 42003228 | Wellingholzhausen-Südwest | 42323036 | Rockenberg              |
| 41842780 | Elz-Hochtal          | 42003244 | Schledehausen             | 42323068 | Hassenhausen            |
| 41842860 | Rastatt-Wintersdorf  | 42003260 | Vennermoor                | 42323084 | Goßfelden               |
| 41842892 | Steinweiler          | 42003276 | Steinfeld (Oldenburg)     | 42323100 | Wiesenfeld              |
| 41842908 | Rhodt unter Rietburg | 42003292 | Bakum-Süd                 | 42323116 | Münden / Neukirchen     |
| 41842940 | Ebertsheim           | 42003308 | Garther Heide             | 42323132 | Neerdar                 |
| 41842956 | Freimersheim         | 42003324 | Charlottendorf            | 42323148 | Madfeld                 |
| 41842972 | Wörrstadt / Sulzheim | 42003356 | Lehmden                   | 42323180 | Paderborn-West          |
| 41842988 | Ingelheim-Ost        | 42162748 | Riedöschingen             | 42323196 | Stukenbrock-Senne       |
| 41843020 | Burgschwalbach       | 42162764 | Oberbaldingen             | 42323212 | Leopoldshöhe            |
| 41843036 | Limburg-Offheim      | 42162796 | Altoberndorf              | 42323228 | Falkendiek              |
| 41843052 | Irmtraut             | 42162812 | Haidenhof                 | 42323260 | Barl                    |
| 41843068 | Burbach-Lippe        | 42162972 | Griesheim-West            | 42323276 | Dörrielohe / Bleckriede |
| 41843164 | Schwefe              | 42163004 | Sulzbach (Taunus)         | 42323292 | Sudbruch                |
| 41843180 | Stockumer Holz       | 42163020 | Neu-Anspach-Südost        | 42323308 | Dimhausen               |
| 41843212 | Sassenberg-Nordwest  | 42163052 | Wetzlar-Garbenheim        | 42323324 | Delmenhorst-Südost      |
| 41843228 | Lienen-Ost           | 42163084 | Silberg                   | 42323356 | Wulsbüttel              |
| 41843260 | Bramsche-Nord        | 42163100 | Beddelhausen              | 42323372 | Düring                  |
| 41843276 | Gehrde-West          | 42163132 | Wiemeringhausen           | 42323388 | Bremerhaven-Nordost     |
| 41843292 | Osteressen           | 42163164 | Eringersfeld              | 42323404 | Midlumer Heide          |
| 41843308 | Stalförden           | 42163180 | Mantinghausen             | 42323420 | Duhnen                  |
| 41843324 | Bösel                | 42163196 | Verl-Südwest              | 42323468 | Sankt Peter-Ording      |
| 41843340 | Dänikhorst           | 42163228 | Spenge-Nordwest           | 42323532 | Hindenburgdamm          |
| 41843356 | Eggeloge             | 42163260 | Wehden                    | 42482748 | Stockach-Süd            |
| 41843372 | Horsten              | 42163276 | Rehden-Südwest            | 42482764 | Hölzle                  |

|          |                             |          |                                        |          |                        |
|----------|-----------------------------|----------|----------------------------------------|----------|------------------------|
| 41843388 | Jever-Nordost               | 42163292 | Großes Moor /<br>Barnstorf             | 42482780 | Oberglashütte          |
| 42002732 | Eggingen                    | 42163324 | Nuttel                                 | 42482812 | Ofterdingen-West       |
| 42002892 | Leimersheim                 | 42163340 | Köterende                              | 42482860 | Heimerdingen-Ost       |
| 42002908 | Schwegenheim                | 42163356 | Strückhausermoor                       | 42482876 | Hohenhaslach-West      |
| 42002924 | Dannstadt                   | 42163372 | Esenshamm                              | 42482892 | Stetten am Heuchelberg |
| 42002940 | Beindersheim                | 42163532 | Sylt                                   | 42482908 | Helmhof                |
| 42482940 | Beerfelden                  | 42643148 | Wettesingen                            | 42803276 | Nöpke                  |
| 42482956 | Zell im Odenwald            | 42643164 | Eissen                                 | 42803292 | Lichtenhorst-Nord      |
| 42483020 | Lindheim                    | 42643180 | Brakel                                 | 42803308 | Lehringen              |
| 42483036 | Borsdorf                    | 42643196 | Ruensiek                               | 42803324 | Kirchwalsede           |
| 42483052 | Lauter                      | 42643212 | Sonneborn                              | 42803340 | Scheeßel-Westerholz    |
| 42483068 | Deckenbach                  | 42643244 | Nienstädt                              | 42803356 | Weertzen               |
| 42483100 | Grüsen                      | 42643260 | Loccum                                 | 42803372 | Brest                  |
| 42483132 | Ober-Waroldern              | 42643276 | Estorf                                 | 42803388 | Hammah-Mittelsdorf     |
| 42483148 | Kohlgrund                   | 42643292 | Schweringerberg                        | 42803404 | Krautsand              |
| 42483164 | Holtheimer Wald             | 42643308 | Eitzendorf                             | 42803420 | Hochfeld               |
| 42483180 | Schwaney                    | 42643324 | Steinberg                              | 42803436 | Wacken                 |
| 42483212 | Lemgo-Südost                | 42643340 | Dipshorn                               | 42803452 | Offenbüttel            |
| 42483228 | Kalletal-Kalldorf           | 42643356 | Rhadereistedt                          | 42803468 | Ekel                   |
| 42483260 | Kreuzkrug                   | 42643372 | Bremervörde-Süd                        | 42803484 | Hollingstedt           |
| 42483276 | Eckershausen                | 42643388 | Oste / Eschhornmoor                    | 42803500 | Eggebek                |
| 42483292 | Mellinghausen-Brake         | 42643404 | Oberndorf                              | 42962732 | Bodnegg-West           |
| 42483308 | Wachendorf                  | 42643436 | Gudendorf                              | 42962748 | Baindt                 |
| 42483324 | Bremen-Südost               | 42643452 | Heide-Südost                           | 42962764 | Bad Schussenried-Süd   |
| 42483340 | Lilienthal                  | 42643468 | Kleve / Eider                          | 42962780 | Ahlen / Rupertshofen   |
| 42483356 | Bornreihe                   | 42643484 | Mildstedt                              | 42962796 | Schlechtenfeld         |
| 42483372 | Appeln                      | 42643500 | Norstedt                               | 42962812 | Heroldstatt-Süd        |
| 42483388 | Lintig                      | 42643516 | Hörup                                  | 42962860 | Rienharz               |
| 42483404 | Ihlienworth                 | 42802732 | Raderach                               | 42962876 | Glashofen              |
| 42483436 | Friedrichskoog              | 42802748 | Hasenweiler                            | 42962924 | Assamstadt-West        |
| 42483452 | Westerdeichstrich           | 42802780 | Altheim-Süd                            | 42962940 | Oberlauda-West         |
| 42483468 | Kating                      | 42802812 | Dottingen                              | 42962956 | Böttigheim-Nord        |
| 42483516 | Risum-Lindholm              | 42802828 | Unterlenningen /<br>Erkenbrechtsweiler | 42962972 | Karbach                |
| 42483532 | Süderlügum                  | 42802844 | Plochingen /<br>Reichenbach            | 42962988 | Halsbach               |
| 42642748 | Frickingen-Altheim-<br>Nord | 42802860 | Lehnenberg                             | 42963020 | Mottgers               |
| 42642764 | Ettisweiler                 | 42802924 | Osterburken                            | 42963036 | Niederkalbach          |
| 42642796 | Mägerkingen-Süd             | 42802940 | Waldstetten                            | 42963100 | Sterkelshausen         |
| 42642828 | Reutlingen-Mittelstadt      | 42802956 | Sonderriet                             | 42963132 | Oberkaufungen          |
| 42642844 | Stuttgart-Plieningen        | 42802988 | Neuhütten                              | 42963164 | Heisebeck              |
| 42642860 | Stuttgart-Mühlhausen        | 42803036 | Freiensteinau-Ost                      | 42963196 | Stadtoldendorf         |

|          |                  |          |                      |          |                             |
|----------|------------------|----------|----------------------|----------|-----------------------------|
| 42642876 | Mundelsheim      | 42803068 | Schwarz              | 42963212 | Wallensen                   |
| 42642908 | Höchstberg       | 42803084 | Olberode             | 42963228 | Eldagsen                    |
| 42642924 | Muckental        | 42803100 | Homburg (Efze)-Süd   | 42963244 | Ronnenberg-Weetzen          |
| 42642956 | Kleinheubach     | 42803116 | Böddiger             | 42963260 | Garbsen-Nordost             |
| 42643036 | Gedern           | 42803148 | Grebenstein          | 42963276 | Vesbeck                     |
| 42643052 | Ulrichstein      | 42803164 | Trendelburg-Deisel   | 42963292 | Eickeloh                    |
| 42643068 | Romrod-Zell      | 42803180 | Fürstenberg          | 42963308 | Walsrode-Nordost            |
| 42643084 | Wasenberg        | 42803196 | Wilmeröderberg       | 42963324 | Hiddingen                   |
| 42643100 | Gilsa            | 42803212 | Grohnde              | 42963340 | Benkeloh                    |
| 42643132 | Bründersen       | 42803260 | Wunstorf / Steinhude | 42963356 | Heidenau                    |
| 42963372 | Apensen          | 43282924 | Finsterlohr          | 43443260 | Ohof                        |
| 42963404 | Elmshorn-Südwest | 43282940 | Hemmersheim          | 43443276 | Helmerkamp                  |
| 42963436 | Silzen           | 43282972 | Seligenstadt         | 43443292 | Marwede                     |
| 42963452 | Brinjahe         | 43282988 | Rundelshausen        | 43443324 | Allenbostel                 |
| 42963484 | Geltorf          | 43283004 | Oerlenbach-West      | 43443340 | Embsen                      |
| 42963500 | Kattbek          | 43283020 | Steinach             | 43443356 | Bardowick / Handorf         |
| 42963516 | Husbyholz        | 43283036 | Oberelsbach-West     | 43443372 | Geesthacht-Nordwest         |
| 43122716 | Siebers          | 43283052 | Feldaquelle (Rhön)   | 43443404 | Lasbek-Gut                  |
| 43122732 | Wangen-Nordost   | 43283068 | Dermbach-West        | 43443420 | Dreggers                    |
| 43122748 | Immenried-Nord   | 43283100 | Breitzbach           | 43443436 | Muggesfelde                 |
| 43122764 | Füramoos         | 43283132 | Dieterode            | 43443452 | Wittmoldt                   |
| 43122780 | Maselheim        | 43283148 | Bischhausen          | 43443468 | Schlesen                    |
| 43122796 | Achstetten-Nord  | 43283196 | Dannhausen           | 43602732 | Görisried                   |
| 43122812 | Herrlingen       | 43283212 | Bönnien              | 43602748 | Huttenwang                  |
| 43122844 | Lauterstein      | 43283228 | Farmsen              | 43602764 | Helchenried                 |
| 43122892 | Unteraspach      | 43283244 | Mehrum               | 43602780 | Zaisertshofen               |
| 43122924 | Herrenzimmern    | 43283276 | Altencelle           | 43602796 | Muttershofen                |
| 43122940 | Bernsfelden-Nord | 43283356 | Tangendorf           | 43602828 | Fristingen-West             |
| 43123004 | Untererthal      | 43283372 | Hamburg-Ochsenwerder | 43602860 | Nördlingen-Ost              |
| 43123020 | Schildeck        | 43283404 | Tangstedt            | 43602892 | Königshofen an der Heide    |
| 43123052 | Elters           | 43283420 | Barkenholm           | 43602924 | Hainklingen                 |
| 43123068 | Rasdorf-West     | 43283436 | Willingrade          | 43602940 | Dietersheim-Nord            |
| 43123100 | Solz             | 43283452 | Groß Buchwald        | 43602988 | Knetzgau                    |
| 43123116 | Waldkappel-Nord  | 43283484 | Spreng               | 43603004 | Hofheim in Unterfranken-Ost |
| 43123148 | Dramfeld         | 43442716 | Wagneritz            | 43603020 | Alsleben                    |
| 43123196 | Brunsen          | 43442732 | Kempten (Allgäu)-Süd | 43603036 | Haina-Nord                  |
| 43123228 | Emmerke          | 43442748 | Schrattenbach        | 43603052 | Dillstädt                   |
| 43123260 | Altwarmbüchen    | 43442764 | Stephansried         | 43603100 | Friedrichswerth-Nord        |
| 43123404 | Himmelmoor       | 43442780 | Greimeltshofen       | 43603116 | Großengottern               |
| 43123420 | Lentförden       | 43442796 | Oberegg              | 43603164 | Bad Sachsa                  |
| 43123436 | Arpsdorf         | 43442828 | Obermedlingen        | 43603212 | Schladen                    |
| 43123452 | Nortorf          | 43442844 | Fleinheim            | 43603228 | Wolfenbüttel-Ost            |



|          |                           |          |                                     |          |                           |
|----------|---------------------------|----------|-------------------------------------|----------|---------------------------|
| 43123468 | Bredenbek                 | 43442876 | Stödtlen                            | 43603276 | Wesendorf-Westerholz      |
| 43123500 | Ketelsby                  | 43442908 | Schorndorf                          | 43603292 | Hankensbüttel-West        |
| 43123516 | Koppelheck                | 43442940 | Wüstphül                            | 43603308 | Nettelkamp                |
| 43282716 | Wiedemannsdorf            | 43442972 | Lülsfeld                            | 43603324 | Emmendorf                 |
| 43282748 | Bimmlings                 | 43442988 | Grettstadt-Nord                     | 43603356 | Lüdersburg                |
| 43282764 | Tannheim                  | 43443036 | Mellrichstadt-Ost                   | 43603372 | Witzeeze                  |
| 43282780 | Kirchberg an der Iller    | 43443052 | Herpf                               | 43603388 | Niendorf/Stecknitz        |
| 43282796 | Vöhringen                 | 43443100 | Eisenach-Stregda                    | 43603404 | Düchelsdorf               |
| 43282812 | Nersingen-West            | 43443132 | Dingelstädt-Süd                     | 43603420 | Eckhorst                  |
| 43282828 | Ballendorf-Nord           | 43443148 | Wintzingerode                       | 43603436 | Holstendorf               |
| 43282892 | Crailsheim-Ost            | 43443212 | Upen                                | 43603468 | Stöfs                     |
| 43282908 | Brettheim                 | 43443244 | Woltorf                             | 43762732 | Nachsee                   |
| 43762748 | Tremmelschwang            | 43922940 | Erlangen-Bruck                      | 44083100 | Grammetal-Nord            |
| 43762764 | Ummenhofen                | 43922972 | Strullendorf-<br>Amlingstadt        | 44083116 | Vogelsberg-Nord           |
| 43762780 | Langerringen-Südwest      | 43922988 | Windischletten                      | 44083132 | Oberheldrungen            |
| 43762828 | Possenried                | 43923020 | Dörfles-Esbach                      | 44083148 | Martinsrieth              |
| 43762844 | Donauwörth-<br>Riedlingen | 43923036 | Mausendorf                          | 44083164 | Wippra                    |
| 43762876 | Heidenheim-<br>Eggenthal  | 43923084 | Kirchheim-Süd                       | 44083180 | Ballenstedt               |
| 43762892 | Laubenzedel               | 43923116 | Werningshausen                      | 44083196 | Hedersleben               |
| 43762908 | Ziegendorf                | 43923132 | Oberbösa                            | 44083212 | Oschersleben-Günthersdorf |
| 43762924 | Oberreichenbach           | 43923148 | Kelbra-West                         | 44083228 | Ovelgünne                 |
| 43762940 | Borbath                   | 43923196 | Halberstadt-Süd                     | 44083260 | Jeseritz-West             |
| 43762956 | Lonnerstadt-Nord          | 43923212 | Schlanstedt                         | 44083276 | Schwiesau                 |
| 43762988 | Leppelsdorf               | 43923228 | Helmstedt-Reinsdorf                 | 44083308 | Riebau-Nord               |
| 43763036 | Weitersroda               | 43923244 | Weferlingen /<br>Grasleben          | 44083324 | Klautze                   |
| 43763084 | Mühlberg-West             | 43923260 | Oebisfelde-<br>Weferlingen-Niendorf | 44083340 | Neu Kaliß                 |
| 43763100 | Molschleben               | 43923276 | Neuferchau                          | 44083356 | Klein Krams               |
| 43763116 | Urleben                   | 43923292 | Püggen                              | 44083388 | Groß Rogahn               |
| 43763132 | Gundersleben              | 43923308 | Cheine                              | 44083404 | Alt Meteln                |
| 43763148 | Kleinfurra-Hain           | 43923324 | Krummasel                           | 44083420 | Alt Jassewitz             |
| 43763196 | Wernigerode-<br>Reddeber  | 43923340 | Laake                               | 44242732 | Loisach / Lainbach        |
| 43763212 | Osterwieck-Hessen         | 43923356 | Lübtheen                            | 44242796 | Günding                   |
| 43763228 | Schöppenstedt-<br>Nordost | 43923372 | Körchow                             | 44242812 | Eglersried                |
| 43763244 | Ochsendorf                | 43923388 | Woez                                | 44242828 | Göbelsbach                |
| 43763292 | Waddekath                 | 43923404 | Holdorf                             | 44242844 | Zuchering                 |
| 43763308 | Varbitz                   | 43923420 | Mallentin                           | 44242860 | Echenzell                 |
| 43763324 | Bankewitz                 | 43923484 | Lemkenhafen                         | 44242908 | Neumarkt-Rittershof       |
| 43763340 | Nahrendorf                | 44082748 | Weilheim in                         | 44242924 | Oberrieden                |

|          |                                   |          |                           |          |                      |
|----------|-----------------------------------|----------|---------------------------|----------|----------------------|
|          |                                   |          | Oberbayern                |          |                      |
| 43763356 | Amholz                            | 44082796 | Oberweikertshofen         | 44242940 | Kirchensittenbach    |
| 43763388 | Hollenbek                         | 44082812 | Sielenbach-Nord           | 44242956 | Weidensees           |
| 43763404 | Schlagsdorf                       | 44082828 | Gollingkreut              | 44242972 | Reizendorf           |
| 43763452 | Marxdorf                          | 44082844 | Wagenhofen                | 44243084 | Milda                |
| 43763468 | Truppenübungsplatz<br>Putlos      | 44082860 | Ochsenfeld-Ost            | 44243100 | Apolda-Oberndorf     |
| 43922732 | Wildsteig                         | 44082876 | Titting-Kaldorf           | 44243116 | Herrengosserstedt    |
| 43922780 | Petzenhausen                      | 44082892 | Tiefenbach                | 44243132 | Wendelstein          |
| 43922796 | Mering-Sankt Afra                 | 44082940 | Eschenau                  | 44243148 | Einsdorf             |
| 43922812 | Derching                          | 44082956 | Hundsboden                | 44243164 | Klostermansfeld      |
| 43922828 | Neukirchen                        | 44082972 | Siegritz                  | 44243180 | Mehringen            |
| 43922844 | Staudheim                         | 44082988 | Wotzendorf                | 44243196 | Hecklingen-Nordwest  |
| 43922892 | Stirn                             | 44083004 | Strössendorf              | 44243212 | Altenweddingen-West  |
| 43922908 | Poppenreuth                       | 44083020 | Sichelreuth-Süd           | 44243228 | Irxleben             |
| 43922924 | Oberasbach                        | 44083084 | Tannroda                  | 44243260 | Letzlingen-Ost       |
| 44243276 | Lindstedt                         | 44562796 | Moosinning-West           | 44722908 | Bubach an der Naab   |
| 44243292 | Beese                             | 44562812 | Rudlfing                  | 44722924 | Dürnsricht           |
| 44243308 | Arendsee-Gestien                  | 44562828 | Airischwand               | 44722972 | Krummennaab          |
| 44243324 | Kapern                            | 44562844 | Mitterstetten             | 44722988 | Manzenberg           |
| 44243372 | Friedrichsmoor                    | 44562860 | Abensberg-Nord            | 44723036 | Schönbrunn           |
| 44243404 | Liessow                           | 44562892 | Buxlohe                   | 44723052 | Steinsdorf           |
| 44243420 | Krassow                           | 44562924 | Köfering                  | 44723068 | Neugernsdorf         |
| 44243436 | Boiensdorf                        | 44562940 | Atzmannsricht             | 44723084 | Kauern               |
| 44402732 | Lenggries                         | 44562972 | Höflas                    | 44723100 | Nedissen             |
| 44402812 | Kranzberg                         | 44563020 | Eppenreuth                | 44723132 | Lützen-Nordost       |
| 44402828 | Geroldshausen in der<br>Hallertau | 44563036 | Gebersreuth               | 44723148 | Großkugel            |
| 44402844 | Geisenfeld-Nord                   | 44563052 | Langenbuch                | 44723164 | Brehna-West          |
| 44402860 | Hüttenhausen                      | 44563068 | Auma                      | 44723180 | Tornau vor der Heide |
| 44402876 | Altmühlmünster                    | 44563084 | Lindenkreuz               | 44723196 | Dessau-Nordwest      |
| 44402892 | Wissing-Ost                       | 44563100 | Heideland-<br>Königshofen | 44723212 | Trüben               |
| 44402908 | Oberwiesenacker                   | 44563116 | Gröbitz                   | 44723244 | Tucheim / Paplitz    |
| 44402924 | Schwend                           | 44563148 | Hohenweiden               | 44723260 | Jerichow-Roßdorf     |
| 44402940 | Holnstein                         | 44563164 | Nehlitze                  | 44723292 | Gülpe                |
| 44402956 | Degelsdorf                        | 44563180 | Pilsenhöhe                | 44723308 | Kümmernitz           |
| 44402972 | Neuhof                            | 44563196 | Kühren                    | 44723324 | Bärensprung          |
| 44402988 | Dressendorf                       | 44563212 | Gehrden                   | 44723340 | Kemnitz              |
| 44403004 | Gundlitz                          | 44563228 | Möckern                   | 44723356 | Schmolde             |
| 44403020 | Döbra                             | 44563244 | Reesen-Ost                | 44723404 | Hoppenrade           |
| 44403068 | Kolba                             | 44563260 | Elbe-Parey                | 44723420 | Recknitz             |
| 44403116 | Bad Kösen-West                    | 44563276 | Tangermünde-Nord          | 44723436 | Göldenitz            |
| 44403132 | Albersroda                        | 44563292 | Gewerbepark Altmark       | 44723452 | Vogtshagen           |

|          |                            |          |                                 |          |                        |
|----------|----------------------------|----------|---------------------------------|----------|------------------------|
| 44403148 | Stedten                    | 44563308 | Werben-Ost                      | 44882764 | Gunzenham              |
| 44403164 | Beesenstedt                | 44563324 | Viesecke                        | 44882780 | Schlicht               |
| 44403180 | Beesedau                   | 44563356 | Porep                           | 44882796 | Reibersdorf            |
| 44403196 | Neugattersleben            | 44563372 | Gischow                         | 44882812 | Hinterskirchen         |
| 44403228 | Biederitz                  | 44563388 | Langenhagen                     | 44882828 | Adlkofen               |
| 44403244 | Heinrichsberg-Nord         | 44563404 | Groß Upahl                      | 44882844 | Paindlkofen            |
| 44403276 | Möringen                   | 44563420 | Oettelin                        | 44882860 | Allkofen               |
| 44403292 | Polkau                     | 44563436 | Ziesendorf-Buchholz             | 44882876 | Roith                  |
| 44403308 | Seehausen-Süd              | 44722732 | Bayrischzell                    | 44882892 | Grubberg               |
| 44403324 | Wittenberge-Ost            | 44722764 | Holzen                          | 44882908 | Bruck in der Oberpfalz |
| 44403340 | Karstädt-Ost               | 44722780 | Niederaltmannsberg              | 44882924 | Altendorf-Fronhof      |
| 44403356 | Stresendorf                | 44722796 | Lengdorf                        | 44882940 | Großenschwand          |
| 44403388 | Prestin                    | 44722812 | Kirchberg<br>(Oberbayern)       | 44882956 | Ottenrieth             |
| 44403404 | Sternberg-Nordwest         | 44722828 | Unterlenghart                   | 44882972 | Liebenstein            |
| 44403420 | Hermannshagen              | 44722844 | Rottenburg an der<br>Laaber-Ost | 44883020 | Landwüst               |
| 44403436 | Klein Siemen               | 44722860 | Langquaid                       | 44883052 | Lengenfeld-Süd         |
| 44562732 | Rottach-Egern-Ost          | 44722876 | Pentling                        | 44883068 | Fraureuth              |
| 44562780 | Baldham                    | 44722892 | Eitlbrunn                       | 44883084 | Crimmitschau-Gösau     |
| 44883100 | Lödla                      | 45043404 | Duckow                          | 45363068 | Drebach / Hopfgarten   |
| 44883148 | Leipzig-Seehausen          | 45043420 | Schorrentin                     | 45363116 | Döbeln-Ziegra          |
| 44883164 | Sauseditz                  | 45043436 | Wasdow                          | 45363132 | Leuben                 |
| 44883196 | Wörlitz                    | 45043452 | Drechow                         | 45363148 | Olganitz               |
| 44883228 | Schlamau                   | 45043468 | Velgast                         | 45363164 | Triestewitz            |
| 44883276 | Gräningen                  | 45043484 | Sundische Wiese                 | 45363196 | Neuerstadt             |
| 44883292 | Kleßen-Görne-West          | 45202748 | Siegsdorf                       | 45363212 | Jüterbog-Südost        |
| 44883308 | Bückwitz                   | 45202764 | Holzhausen /<br>Dieperting      | 45363228 | Luckenwalde-Nordwest   |
| 44883324 | Wulkow                     | 45202780 | Kirchweidach-Nordost            | 45363244 | Schiaß                 |
| 44883340 | Wittstock-Süd              | 45202796 | Neuötting                       | 45363292 | Velten                 |
| 44883356 | Wredenhagen                | 45202812 | Huldsessen                      | 45363308 | Teschendorf            |
| 44883372 | Lexow                      | 45202828 | Ruhstorf                        | 45363324 | Kraatz                 |
| 44883388 | Neu Gaarz                  | 45202844 | Landau an der Isar              | 45363372 | Wanzka                 |
| 44883404 | Hohen Demzin               | 45202860 | Straßkirchen                    | 45363404 | Altentreptow           |
| 44883436 | Reprnitz                   | 45202876 | Gaishausen                      | 45363420 | Alt Tellin             |
| 44883452 | Marlow                     | 45202892 | Kasparzell                      | 45363436 | Görmin                 |
| 44883468 | Hessenburg                 | 45202908 | Kothmaißling                    | 45363452 | Klein Petershagen      |
| 44883484 | Prerow                     | 45203052 | Schwarzenberg-<br>Nordost       | 45363468 | Mellnitz               |
| 45042764 | Roitham                    | 45203068 | Brünlos                         | 45363484 | Dreschwitz             |
| 45042780 | Peterskirchen-<br>Nordwest | 45203084 | Chemnitz-Rabenstein             | 45363500 | Vieregge               |
| 45042812 | Egglkofen-Ost              | 45203100 | Wiederau                        | 45522812 | Kößlarn                |

|          |                     |          |                            |          |                        |
|----------|---------------------|----------|----------------------------|----------|------------------------|
| 45042828 | Loizenkirchen       | 45203116 | Colditz-Ost                | 45522828 | Haarbacherloh          |
| 45042844 | Moosthenning        | 45203132 | Gastewitz                  | 45522844 | Hofkirchen / Pleinting |
| 45042860 | Pönning             | 45203148 | Lossatal-Voigtshain        | 45522860 | Grattersdorf           |
| 45042876 | Oberzeitldorn       | 45203164 | Großwig                    | 45523068 | Sorgau                 |
| 45042892 | Völling             | 45203180 | Axien                      | 45523084 | Kleinhartmannsdorf     |
| 45042908 | Hitzelsberg         | 45203196 | Gentha                     | 45523100 | Großschirma            |
| 45042924 | Heinrichskirchen    | 45203212 | Eckmannsdorf               | 45523116 | Raußlitz               |
| 45043068 | Reinsdorf-Ost       | 45203228 | Niebel                     | 45523132 | Prausitz               |
| 45043084 | Ebersbach           | 45203276 | Wustermark                 | 45523164 | Zinsdorf               |
| 45043100 | Neuenmörbitz        | 45203308 | Pabsthum                   | 45523180 | Jagsal                 |
| 45043116 | Bad Lausick-Südwest | 45203356 | Wesenberg                  | 45523196 | Knippelsdorf           |
| 45043132 | Klinga              | 45203388 | Groß Flotow                | 45523212 | Petkus-Süd             |
| 45043148 | Groitzsch           | 45203404 | Tüzen                      | 45523244 | Glienick               |
| 45043196 | Pratau              | 45203420 | Glendelin                  | 45523308 | Kreuzbruch             |
| 45043212 | Boßdorf             | 45203452 | Grimmen-Nord               | 45523340 | Templin-West           |
| 45043228 | Mörz                | 45203468 | Stralsund-Süd              | 45523372 | Krumbeck               |
| 45043260 | Jeserig             | 45362748 | Anger                      | 45523388 | Kublank                |
| 45043292 | Jahnberge           | 45362796 | Stammham                   | 45523404 | Salow                  |
| 45043308 | Protzen             | 45362812 | Fraunleiten                | 45523420 | Medow                  |
| 45043340 | Zechlin-West        | 45362844 | Eschlbach                  | 45523436 | Züssow                 |
| 45043356 | Lärz                | 45362860 | Deggendorf-<br>Natternberg | 45523452 | Gahlkow                |
| 45043388 | Torgelow am See     | 45363052 | Königswalde                | 45523500 | Neddesitz              |
| 45682812 | Reindlöd            | 45843196 | Schlabendorf               | 46003372 | Woddow                 |
| 45682828 | Aspertsham          | 45843212 | Lubolz                     | 46003388 | Rothenklempenow        |
| 45682844 | Ranzing             | 45843244 | Görsdorf                   | 46163100 | Sebnitz-Mittelndorf    |
| 45683084 | Burkersdorf         | 45843308 | Eberswalde-Tornow          | 46163116 | Oberottendorf          |
| 45683116 | Röhrsdorf           | 45843324 | Ziethen                    | 46163132 | Siebitz                |
| 45683132 | Lenz                | 45843340 | Greiffenberg-<br>Nordwest  | 46163148 | Wittichenau-Saalau     |
| 45683180 | Kirchhainer Wiesen  | 45843356 | Bertikow                   | 46163228 | Friedland-Günthersdorf |
| 45683196 | Wüstermarke         | 45843372 | Göritz-Tornow              | 46163260 | Petersdorf             |
| 45683212 | Golßen              | 45843388 | Belling                    | 46163276 | Diedersdorf            |
| 45683244 | Bestensee           | 46002844 | Thalberg                   | 46163292 | Letschin               |
| 45683292 | Bernau-Ost          | 46003100 | Pirna-Südost               | 46323228 | Treppeln               |
| 45683388 | Schwarzensee        | 46003132 | Oberlichtenau              | 46323276 | Reitwein               |
| 45683404 | Lübkowsee           | 46003196 | Göritz                     | 46483116 | Niedercunnersdorf      |
| 45683420 | Bargischow          | 46003260 | Fürstenwalde-Nordost       | 46483132 | Weißenberg-Nordost     |
| 45683436 | Zemitz              | 46003276 | Müncheberg-<br>Nordwest    | 46483148 | Kreba                  |
| 45842844 | Oberkümmering       | 46003292 | Möglin                     | 46483164 | Weißkeißel             |
| 45843084 | Falkenhain          | 46003308 | Neuranft                   | 46643116 | Kiesdorf auf dem Eigen |
| 45843100 | Kreischa            | 46003340 | Heinersdorf / Landin       | 46643132 | Kunnersdorf            |
| 45843148 | Ortrand-Ost         | 46003356 | Wartin                     |          |                        |

## Step 6: Specify locations of wild bee surveys within each landscape quadrat

The algorithm for the initial determination nesting aid locations, as implemented in R, version 4.0.2 [71], can be found as supplementary file LUCAS\_NestingAids.R together with the SHP files of LUCAS grid points and landscape quadrats, and the CSV file with LUCAS ids. Please note that the Basic DLM data used to distinguish land use types are administrative data available for purchase via <https://gdz.bkg.bund.de/index.php/default/digitales-basis-landschaftsmodell-kompakt-basis-dlm-kompakt.html> (accessed on 14 July 2022).
